1 **Repeated global migrations on different plant hosts by the tropical pathogen**

2 *Phytophthora palmivora*

3

4 Jianan Wang<sup>1</sup>, Michael D. Coffey<sup>2</sup>, Nicola De Maio<sup>3,4</sup>, Erica M. Goss<sup>1\*</sup>

5

6 <sup>1</sup> Department of Plant Pathology and Emerging Pathogens Institute, University of Florida,  
7 Gainesville, FL, USA 32611;

8 <sup>2</sup> Department of Plant Pathology and Microbiology, University of California, Riverside, CA,  
9 USA 92521;

10 <sup>3</sup> Nuffield Department of Medicine, University of Oxford, OX3 7BN, Oxford, United Kingdom.

11 <sup>4</sup> European Molecular Biology Laboratory, European Bioinformatics Institute (EMBL-EBI),  
12 Wellcome Genome Campus, Hinxton CB10 1SD, UK

13

14 \*e-mail: [emgoss@ufl.edu](mailto:emgoss@ufl.edu)

15

16 **Keywords:** host tracking, host shift, Oomycete, genetic diversity, structured coalescent analysis

17

18 **Running title:** Host tracking by a broad host range plant pathogen

19 **ORCID ID:**

20 Jianan Wang: <https://orcid.org/0000-0002-7704-666X>

21 Nicola De Maio: <https://orcid.org/0000-0002-1776-8564>

22 Erica M. Goss: <https://orcid.org/0000-0003-3512-2107>

23

24

25 **Abstract**

26 The genetic structure and diversity of plant pathogen populations are the outcomes of  
27 evolutionary interactions with hosts and local environments, and migration at different scales,  
28 including human-enabled long-distance dispersal events. As a result, patterns of genetic variation  
29 in present populations may elucidate the history of pathogens. *Phytophthora palmivora* is a  
30 devastating oomycete that causes disease in a broad range of plant hosts in the tropics and  
31 subtropics worldwide. The center of diversity of *P. palmivora* is in Southeast Asia, but it is a  
32 destructive pathogen of hosts native to South America. Our objective was to use multilocus  
33 sequence analysis to resolve the origin and historical migration pathways of *P. palmivora*. Our  
34 analysis supports Southeast Asia as a center of diversity of *P. palmivora* and indicates that a  
35 single colonization event was responsible for the global pandemic of black pod disease of cacao.  
36 Analysis using the structured coalescent indicated that *P. palmivora* emerged on cacao and that  
37 cacao has been the major source of migrants to populations in Asia, Africa, and Pacific Islands.  
38 To explain these results, we hypothesize widespread introgression between the pandemic cacao  
39 lineage and populations native to Asia and the Pacific Islands. The complex evolutionary history  
40 of *P. palmivora* is a consequence of geographic isolation followed by long-distance movement  
41 and host jumps that allowed global expansion with cacao, coconut and other hosts.

42

43

44

45 With continued growth of human populations and change in global climate, there is increasing  
46 concern over plant diseases affecting food crop and economic security<sup>1</sup>. Epidemics of plant  
47 disease can result in major yield losses and associated economic consequences<sup>2</sup>. In low- and  
48 middle-income countries, plant diseases can have a relatively larger impact on local socio-  
49 economic development<sup>3,4</sup>. Understanding the population biology and evolution of plant  
50 pathogens can aid in disease management. For example, determining the geographic history of a  
51 plant pathogen can help locate plant germplasm that co-evolved with the pathogen and exhibits  
52 disease resistance, which can be employed in plant breeding programs. Knowledge of plant  
53 pathogen migration patterns can lead to informed decision-making for disease prevention,  
54 specifically to limit re-introductions and pathogen re-emergence<sup>5</sup>. Global pandemics may  
55 originate from a very successful invasive population that itself is responsible for multiple  
56 secondary invasions<sup>3,6-8</sup>. Hence, mitigation strategies may specifically target invasive  
57 populations or genotypes<sup>9,10</sup>.

58         However, the above efforts can be hampered by pathogens making dramatic host jumps.  
59 Host jumps are pervasive in the emergence or spread of plant pathogens and have been identified  
60 as a crucial mechanism underlying pathogen diversification and ultimately speciation<sup>11,12</sup>.  
61 International travel and global trade over the course of human history have exposed hosts to new  
62 pathogens, thus, facilitating host jumps<sup>1,3,9,13-15</sup>. Deciphering complex interactions among plant  
63 hosts, pathogens and human activities can elucidate major drivers behind the emergence, re-  
64 emergence and dispersal of plant pathogens<sup>1</sup>. Many such studies of pathogen emergence have  
65 targeted major crop pathogens that exhibit relatively narrow host associations<sup>5,16-21</sup>. When  
66 pathogens have multiple host associations, can the influence of different hosts on pathogen  
67 emergence and dispersal be resolved?

68           *Phytophthora* is a genus of plant-damaging Oomycetes, including more than 100  
69 described species<sup>22-25</sup>. *Phytophthora* species can infect a broad range of plant hosts<sup>26</sup> and have  
70 caused enormous economic losses to agro-ecosystems and ecological damage in natural  
71 ecosystems. The relatively narrow host range pathogen *Phytophthora infestans*, causal agent of  
72 potato and tomato late blight, was globally distributed on potato, leading to the Great Irish  
73 Famine. In 2008, *P. infestans* spread across the Eastern United States on tomato plants for home  
74 gardens<sup>27</sup>. *P. ramorum* is a broad host range pathogen, which dispersed on ornamental plants  
75 followed by host jumps to timber and forest trees<sup>28</sup>. The resulting disease outbreaks in North  
76 America and Europe have been economically costly and have changed the ecology of coastal  
77 California forests<sup>29</sup>. *Phytophthora palmivora* (Butler) Butler (1919) is a destructive tropical and  
78 subtropical plant pathogen with a very broad host range in the tropics and subtropics<sup>30,31</sup>. *P.*  
79 *palmivora* causes problematic diseases of coconut and other palms (bud rot), cacao (black pod,  
80 canker, and cherelle wilt), rubber (black stripe), durian (fruit rot and canker), orchids and other  
81 ornamentals, and more<sup>26</sup>. Annual losses due to black pod of cacao, caused primarily by *P.*  
82 *palmivora*, have been estimated at more than US\$400 million per year<sup>103</sup> and bud rot endemics  
83 have affected more than 70,000 ha of oil palm in Colombia<sup>32</sup>. However, like many other tropical  
84 pathogens, research on *P. palmivora* population biology and genetics has lagged far behind  
85 temperate *Phytophthora*, even though this pathogen is responsible for significant economic  
86 losses. To advance research on *P. palmivora*, the genome of an isolate from cacao was recently  
87 sequenced. Estimated genome size was greater than 151.23 Mb with 44 327 genes and initial  
88 analysis of gene models indicated that *P. palmivora* experienced a genome doubling event<sup>33</sup>.

89           The hypothesized center of origin of *P. palmivora* has changed over time. Initially,  
90 Central or South America was suspected to be the native region of the pathogen, because of the

91 susceptibility of indigenous hosts and the apparent global distribution of the pathogen on cacao  
92 (*Theobroma cacao*), which is native to South America<sup>34</sup>. Findings of high levels of genetic  
93 diversity in *P. palmivora* populations in Southeast Asia, particularly among isolates from native  
94 hosts coconut and durian, led to the proposal that Southeast Asia is the center of origin of *P.*  
95 *palmivora*<sup>30,35</sup>. Recent advances in population genetics and coalescent model-based approaches  
96 have revolutionized methods to identify plant pathogen centers of origin, reconstruct migration  
97 pathways and reveal population genetic structure<sup>36-44</sup>. These new tools have substantially  
98 advanced knowledge of the evolutionary history and epidemiology of major plant pathogens, but  
99 have not been applied towards understanding the global spread of *P. palmivora*.

100         The main objective of this study was to describe the global population structure of *P.*  
101 *palmivora* and historical migration pathways using Bayesian and coalescent model-based  
102 inference approaches. We specifically addressed the following questions: (1) Are populations of  
103 *P. palmivora* structured by host or geography? (2) Where is the center of origin of *P. palmivora*?  
104 (3) What were the main migration pathways out of the center of origin? (4) Did host shifts drive  
105 the global expansion of the *P. palmivora*?

106

## 107 **Results**

108 **Nucleotide diversity by geographic region.** We evaluated DNA sequence variation in four  
109 genes (one mitochondrial and three nuclear) for three major geographic regions ([Table 1](#)). Higher  
110 values of average pairwise nucleotide diversity ( $\pi$ ) and Watterson's theta ( $\theta_w$ ) were observed in  
111 the Asia-Pacific region than in Africa and the Americas. Tajima's D and Fu & Li's D\* and F\*  
112 test statistics were not significantly different from zero except for the sample from the Americas  
113 ([Table 1](#)). A significantly positive value of Tajima's D was observed for *trpI* in the Americas,

114 indicating more intermediate frequency alleles than expected under neutral evolution, while all  
115 three test statistics were significantly negative for *coxII* in the Americas, indicating excessive  
116 rare polymorphisms.

117 **Population subdivision and structure.** Population differentiation was tested by AMOVA  
118 (Table 2). All four loci showed a significant portion of genetic variation (8-12%) distributed  
119 among regions (Africa, Americas and Asia-Pacific). Differentiation between the two most  
120 common hosts in the data set, coconut and cacao, explained around one quarter of the genetic  
121 variation in the nuclear loci (23-27%).

122 To further explore population structure, *P. palmivora* isolates were grouped by Bayesian  
123 clustering, using an allelic data set from the three nuclear loci (Fig. 1). When the number of  
124 clusters (K) was set to 2, most isolates from the Asia-Pacific region were in one cluster, and the  
125 majority of isolates from Africa and Americas were in the other. As K was increased, isolates  
126 from Indonesia, Philippines, Malaysia, and Pacific Island formed new clusters. Based on delta K,  
127 the optimum value of K was 2. The genetic structure within the Asia-Pacific region was greater  
128 than in Africa and the Americas. The small sample from south Asia (India and Sri Lanka)  
129 resembled populations in Africa and the Americas, the majority of which were isolated from  
130 cacao. Bayesian clustering of clone-corrected data produced the same overall pattern as the full  
131 data set (Supplementary Fig. 1).

132 The non-parameterized clustering method DAPC showed the first discriminant  
133 component separating isolates collected from cacao in all geographic regions from isolates  
134 collected from coconut and other hosts (Fig. 2). The second discriminant component separated  
135 isolates sampled from durian and other hosts from coconut and cacao isolates. Six isolates

136 collected from coconut and other hosts in the Asia-Pacific and Americas clustered with isolates  
 137 from cacao, consistent with isolates shifting from cacao to other hosts.

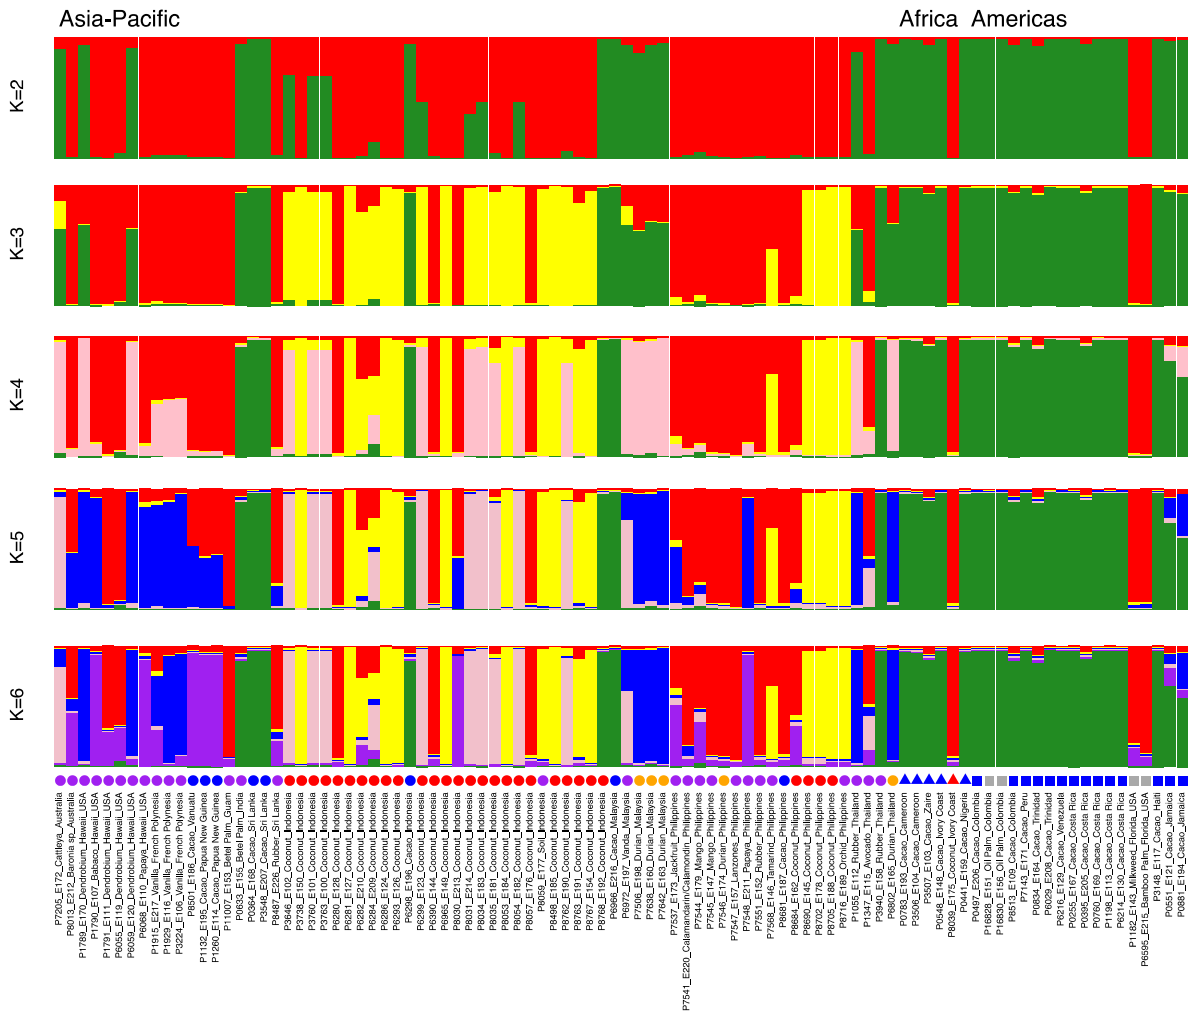

138  
 139 **Fig. 1. STRUCTURE assignments of *P. palmivora* isolates to populations for values of K**  
 140 **from 2 to 6.** Greater genetic structure is apparent in the Asia-Pacific region. Origins of isolates  
 141 are indicated below each bar. Isolates from cacao are indicated by a blue symbol, those from  
 142 coconut with a red symbol, and those from durian with an orange symbol. Isolates with purple or  
 143 gray symbols are from other hosts. Region is indicated by the shape of the symbol (circle for  
 144 Asia-Pacific, triangle for Africa, square for Americas).

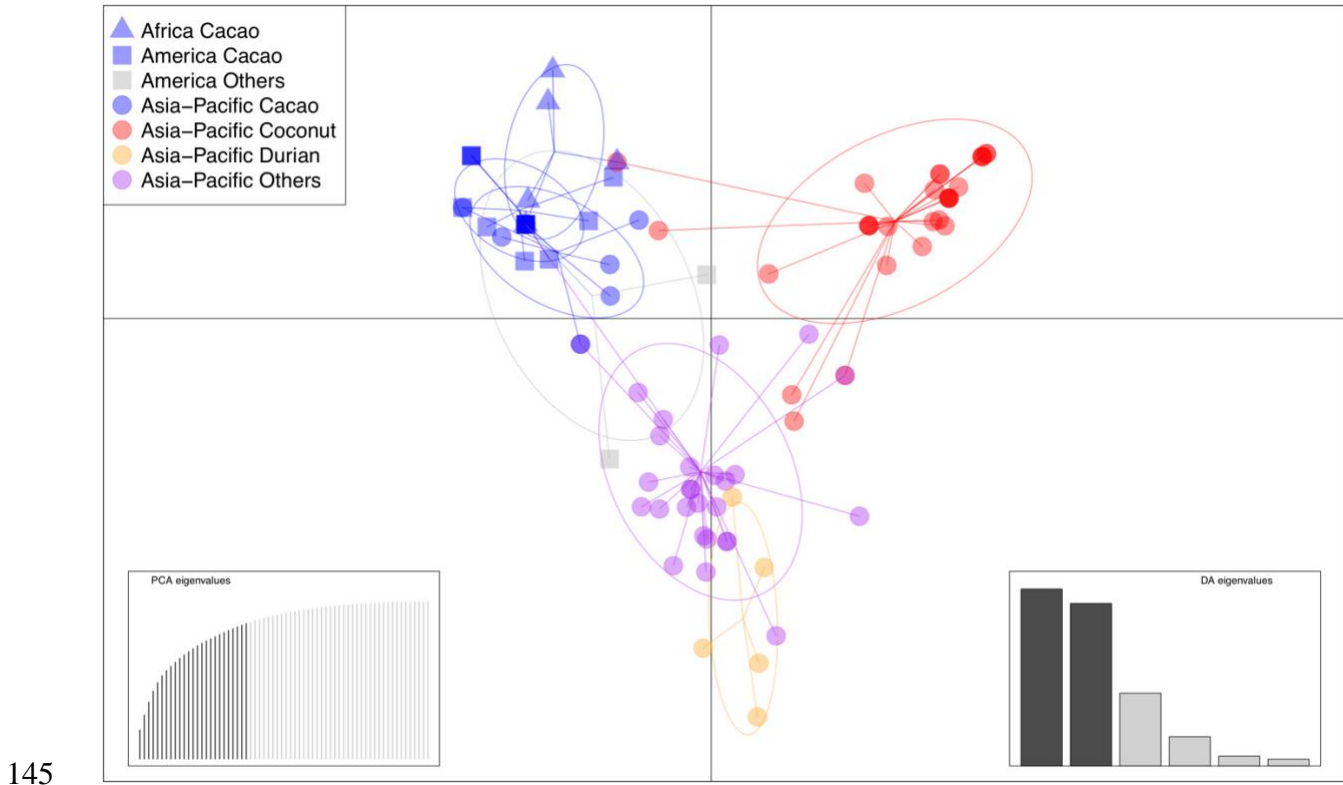

146 **Fig. 2. DAPC clusters of *P. palmivora* isolates from different hosts and geographic regions.**

147 All isolates collected from cacao in the three geographic regions grouped together. Asia-Pacific  
148 isolates sampled from coconut and durian grouped into two largely distinct clusters.

149

150 **Global migration patterns.** Discrete Bayesian phylogeographic analysis was used to infer the

151 geographic location of the root state of each locus<sup>45,46</sup>. The reconstructed root states supported

152 Indonesia and/or Philippines as the inferred evolutionary origin of our sample (Fig. 3). The

153 posterior probabilities for Philippines or Indonesia as the root state varied by locus

154 (Supplementary Table 4). The corresponding analysis with BASTA, which is not as biased by

155 sampling patterns, produced similar maximum clade credibility genealogies but with low

156 posterior probabilities for geographic root states.



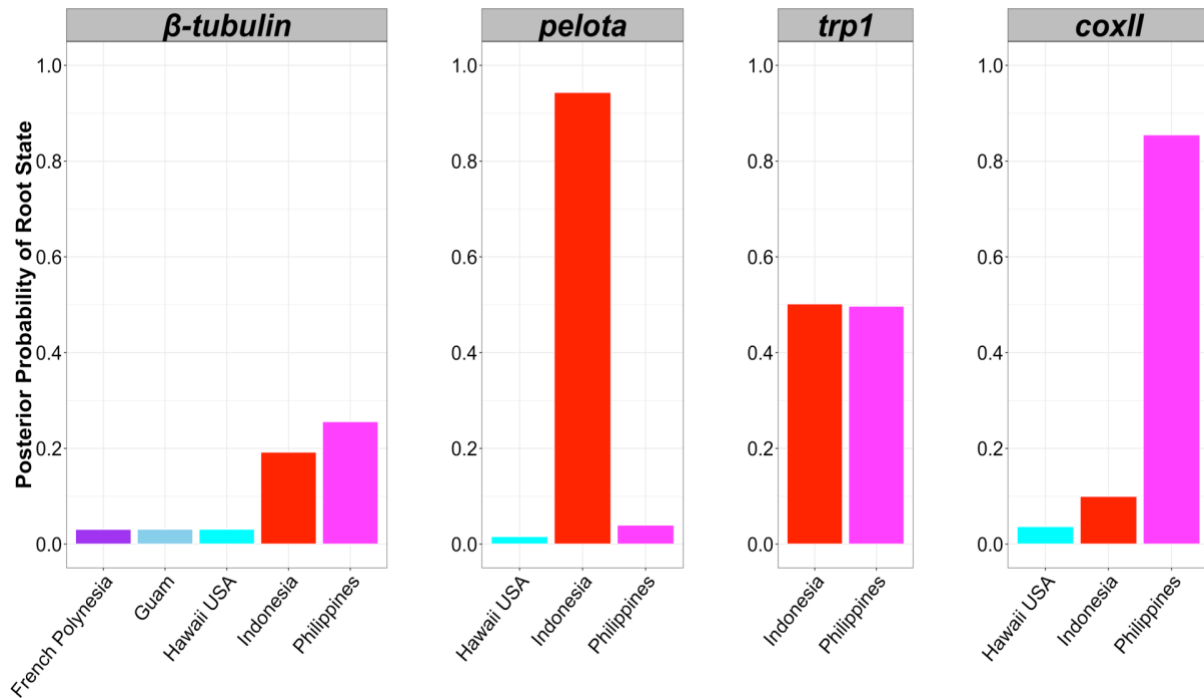

157

158 **Fig. 3. Root state posterior probability values inferred using discrete phylogeographic**  
159 **analysis for each location (country) by locus: *β-tubulin*, *pelota*, *trp1* and *coxII*.** The posterior  
160 probabilities for an Indonesia root (red bar) and/or a Philippines root (magenta bar) are higher  
161 than for the other locations (other colors) for each locus, inferred independently. Due to limited  
162 space, only five locations with the five highest posterior probabilities for *β-tubulin* are shown.  
163 For *pelota*, *trp1* and *cox II*, only the locations with posterior probabilities more than 0.01 are  
164 shown.

165

166 The maximum clade credibility genealogies for the four loci (Fig. 4; Supplementary Figs.  
167 2-4) indicate that lineages presently associated with Southeast Asia and the Pacific Islands  
168 diverged much earlier than lineages associated with Central and South America and Central  
169 Africa (mainly isolated from cacao). The mitochondrial locus, *coxII*, produced three lineages,  
170 one of which shows early diversification and is represented by isolates from SE Asia, Australia,  
171 Papua New Guinea, Vanuatu, French Polynesia, Hawaii, Ivory Coast and Jamaica (Fig. 4).

172 Across loci, isolates from Pacific Islands represented lineages that diverged prior to  
 173 diversification of cacao-associated lineages. We observed that isolates from different hosts  
 174 within given geographic regions had distinct evolutionary histories. For example, an isolate  
 175 collected from coconut in Ivory Coast had distinct ancestry from the cacao isolates collected in  
 176 Central Africa, and this was also observed for isolates from Florida and Jamaica. For the nuclear  
 177 loci, we observed that most of the isolates from cacao exhibited two distinct haplotypes while  
 178 showing little variation within each haplotype among isolates, consistent with a clonal lineage.  
 179 Isolates from Indonesia and Philippines were less likely to have two diverged alleles but they  
 180 exhibited more variation among isolates.

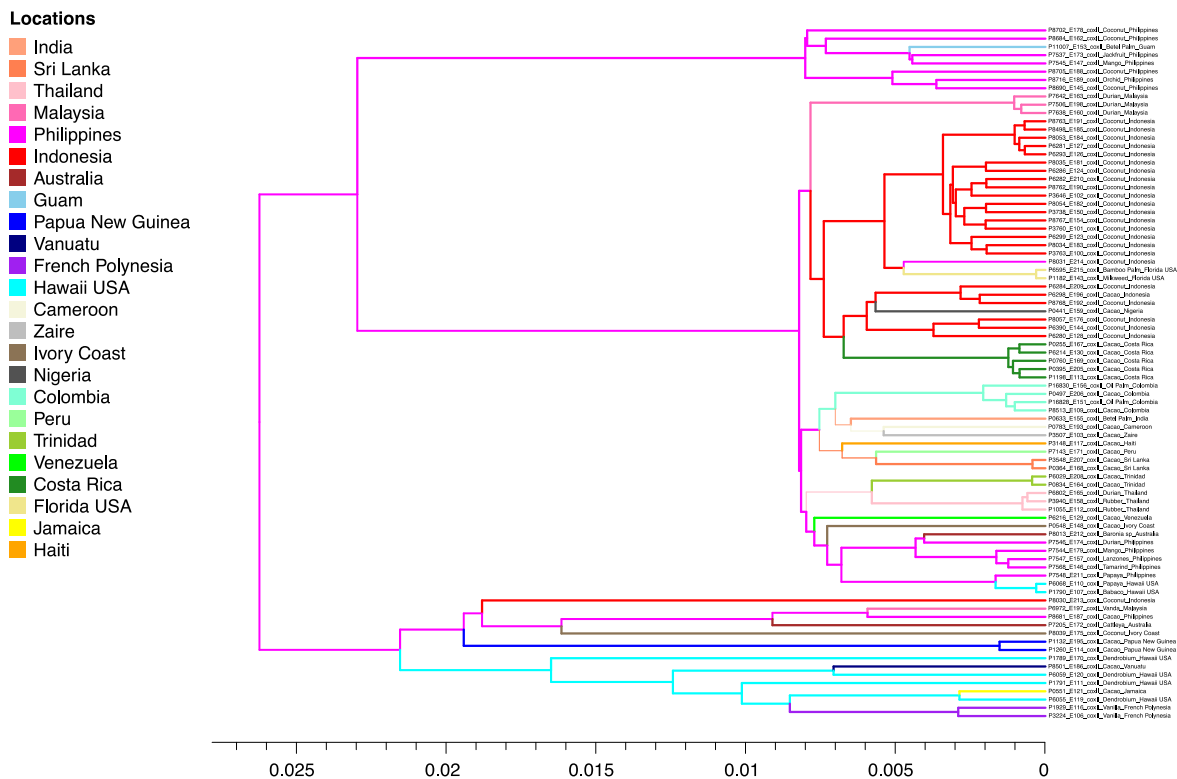

181  
 182 **Fig. 4. Maximum clade credibility genealogy for the *coxII* locus.** Colors of branches indicate  
 183 the most probable geographic origin of each lineage.

184

185 **Host switching.** To complement the phylogeographic analysis and infer patterns of historical  
186 migration between major host groups, we conducted a multi-locus BASTA analysis by host  
187 group and region (Americas, Asia-Pacific and Africa). Based on analyses of genetic structure  
188 and phylogeography, we expected that migration occurred from coconut or other native hosts in  
189 SE Asia to hosts in the Pacific, to cacao in the Americas, and then back to cacao and other hosts  
190 in Asia. The BASTA analysis did not confirm this pattern. Using a two-host model to determine  
191 the directionality of gene flow between cacao and coconut, we inferred cacao to be the root host  
192 with high posterior probabilities ( $\geq 0.96$  for each locus) and significant migration from cacao to  
193 coconut ([Supplementary Table 5a](#)). We examined if the existence of unsampled populations  
194 might have affected the analyses using a three-host model with one unsampled host. Cacao and  
195 the unsampled host were inferred as the root hosts with nearly even posterior probabilities. Mean  
196 rates of migration from cacao to coconut and the unsampled host to coconut were moderate to  
197 high, but the 95% HPD of the migration rates from the unsampled host included zero  
198 ([Supplementary Table 5b](#)), indicating uncertainty in these estimates. To incorporate geography,  
199 we examined a three-deme model, with populations cacao-America, cacao-Asia-Pacific and  
200 coconut-Asia. Cacao-America was inferred as the root state with high posterior probabilities  
201 ( $\geq 0.93$  for each locus). Cacao-America was the major source of migrants, while cacao-Asia-  
202 Pacific and coconut-Asia were the major sinks ([Table 3A](#); [Supplementary Figs. 5-8](#)).

203 Incorporating an unsampled population into this model produced uncertainty in the root state  
204 with posterior probabilities of 0.63-0.68 for cacao-Asia-Pacific and 0.27-0.31 for the unsampled  
205 population and wide 95% HPDs on immigration estimates from the unsampled population ([Table](#)  
206 [3b](#)). To explore if all remaining hosts, other than coconuts and cacao, in the Asia-Pacific region  
207 could represent the unsampled population, we examined a four-deme model replacing the

208 unsampled deme with a putative deme we designated Other-Asia-Pacific. Similar to the previous  
209 models without an unsampled population, cacao-America was inferred as the root state with high  
210 posterior probabilities ( $\geq 0.96$  for each locus), and cacao-Asia-Pacific and coconut-Asia were the  
211 two major sinks. Other-Asia-Pacific was inferred as a third major sink ([Table 3c](#)), which is the  
212 opposite migration direction to the models incorporating an unsampled deme. Models that  
213 explicitly incorporated the few cacao isolates from Africa produced results generally consistent  
214 with the models without the cacao-Africa deme ([Supplementary Table 6a, b](#)).

215

## 216 **Discussion**

217 The evolutionary history of crop pathogens is as complex as the phylogeographic and  
218 agricultural histories of their hosts and the human populations that have cultivated them. Our  
219 multilocus sequence analysis of a global sample of *Phytophthora palmivora* isolates revealed  
220 population subdivision among three major geographic regions (Africa, Americas, Asia-Pacific)  
221 and between hosts, here highly sampled cacao and coconut. We found greater genetic diversity  
222 and more complex population structure within Southeast Asia as compared to other global  
223 regions, and reduced genetic variation among isolates collected from cacao. Therefore, our  
224 results generally support Southeast Asia as the *P. palmivora* center of diversity<sup>30,35</sup>. On the other  
225 hand, our analyses suggest that the Americas are a significant source of the genetic diversity now  
226 observed in the Asia-Pacific region. Here, we argue that the complex evolutionary history of *P.*  
227 *palmivora* reflects the history of human travel and trade in the tropics.

228         The greatest genetic diversity in *P. palmivora* appears to be within and among Pacific  
229 island chains, which naturally introduce geographic isolation due to historically infrequent  
230 movement of plant hosts, including by human migrations<sup>47</sup>. Genetically diverse isolates were

231 associated with coconut palms and a variety of other tropical hosts. However, because the  
232 distribution of hosts sampled was not independent of geographic region, we cannot fully separate  
233 the relative influence of host and geography. For example, American and African isolates largely  
234 clustered together and separately from isolates from the Asia-Pacific region, but cacao was the  
235 most-sampled host in Africa and the Americas. Indeed, the population genetic structure of *P.*  
236 *palmivora* on cacao suggests that a single colonization was responsible for the global pandemic  
237 of *P. palmivora* causing black pod of cacao. The globally successful “cacao strain” is  
238 characterized by a single *coxII* haplotype and STRUCTURE cluster based on the genotypes of  
239 three nuclear loci. The most frequent haplotypes for each locus are associated with cacao. Many  
240 of the isolates from the Americas, Africa, and South Asia represented this cacao-associated  
241 lineage. The resulting pattern of genetic variation in the Americas produced positive values of  
242 Tajima’s D test across nuclear housekeeping genes and a statistically significant negative value  
243 for the mitochondrial *coxII* locus. These values are consistent with a recent population  
244 bottleneck<sup>48</sup>. In the Americas and South Asia, the “cacao strain” was isolated from palms and  
245 rubber, suggesting movement from cacao to other hosts. For example, two isolates obtained from  
246 cacao and oil palm in Colombia had identical sequences at the four sequenced loci. These  
247 isolates shared haplotypes with isolates from cacao worldwide and commercial oil palm  
248 production only began in Colombia in 1945<sup>102</sup>, therefore we infer that *P. palmivora* colonized oil  
249 palm from cacao.

250 We conducted phylogeographic analyses to infer the potential historical processes behind  
251 the observed patterns of genetic variation. Using discrete phylogeography, we inferred root states  
252 of our *P. palmivora* sample to be Indonesia or the Philippines, depending on the locus. We might  
253 expect that the pathogen has a metapopulation structure across these island nations, mediated by

254 sea level changes joining or separating islands, dispersal of infected fruits following sea currents,  
255 or, more recently, trade in hosts infected by *P. palmivora*. The corresponding BASTA analysis  
256 was not able to infer a root location, and our reduced parameter analyses that grouped isolates by  
257 geographic region and host group inferred an American origin. BASTA is less susceptible to the  
258 effects of sampling bias, but inference of an American origin was unexpected because of the  
259 higher genetic diversity of the pathogen in the Asia-Pacific region. Simulations suggest that high  
260 posterior probabilities provided by the discrete model likely underestimate posterior  
261 uncertainty<sup>44</sup>. Our discrete model results reflect deep sampling in Southeast Asia, while the  
262 BASTA results indicate that sampling across a greater diversity of hosts and locations is needed.  
263 A long history of controversy regarding the geographic and evolutionary origin of the late blight  
264 pathogen, *P. infestans*, has been exacerbated by limited sampling of wild relatives of potato in  
265 the South American Andes<sup>49,50</sup> and the geographic origins of many other widespread  
266 *Phytophthora* pathogens are unknown.

267 Migration estimates over the history of our sample of *P. palmivora*, inferred by BASTA,  
268 suggests movement from cacao in the Americas to cacao in Asia and Africa, and from cacao to  
269 other hosts in Asia. Because we observed genetic diversity on other hosts, it is unlikely that the  
270 sole origin of the pathogen is cacao. Indeed, we could not exclude the presence of an alternative,  
271 unsampled source population. In our inferred genealogies, we observed that haplotypes were not  
272 segregating independently, particularly for isolates from cacao, which likely represent an  
273 asexually reproducing lineage. The phylogeny for the *coxII* mitochondrial locus showed two  
274 groups of haplotypes, a large group of closely related haplotypes and a second group of low  
275 frequency, diversified haplotypes, which could represent different histories of ancestral  
276 populations of *P. palmivora*. One explanation for the observed patterns is introgression, perhaps

277 repeated introgression, from the pandemic lineage on cacao to endemic populations of  
278 *Phytophthora* in Southeast Asia and the Pacific Islands. We do not yet have evidence of  
279 populations of *P. palmivora* or a closely related species on wild plants in the Americas which  
280 could have sourced migration to Asia. However, *P. palmivora* infects important tropical cash  
281 crops native to South America, including cacao<sup>52</sup>, rubber<sup>53</sup>, and neotropical orchids<sup>54</sup>. Genome  
282 sequencing of an isolate of *P. palmivora* from cacao indicates that this pathogen underwent  
283 genome doubling. We speculate that genome doubling was the consequence of a hybridization  
284 event between strains of different geographic origin, because genome doubling is commonly  
285 associated with interspecific hybridization<sup>51</sup>.

286         We can draw parallels between global patterns in the genetic variation of *P. palmivora*  
287 and historical global movement of the hosts considered here (Fig. 5). The Philippines represents  
288 one of two independent domestications of coconut (*Cocos nucifera*)<sup>47,55</sup>. Historical and genetic  
289 data have clarified the routes of coconut as it spread throughout the tropics and subtropics<sup>55</sup>.  
290 Various lines of evidence suggest that Pacific coconut was brought from the Philippines to  
291 eastern Polynesia and to the Pacific coast of Latin America by pre-Columbian Austronesians.  
292 Trade occurred in the opposite direction as well, because herbarium specimens and  
293 anthropological studies suggest pre-historic introduction of sweet potato from the Pacific coast of  
294 South America to Polynesia<sup>56</sup>. Later, the Portuguese set up plantations of the South Asian  
295 domestication (Indo-Atlantic genotypes) of coconut in West Africa, Brazil, and the Caribbean.  
296 Our findings of early divergence in our *P. palmivora* sample from the Pacific Islands is  
297 consistent with early movement, possibly on Pacific coconut, whereas isolates from Ivory Coast  
298 and Jamaica with deep nodes suggest movement on Indo-Atlantic coconut. *P. palmivora* infects  
299 numerous other tropical fruits and ornamentals native to the Asia-Pacific region, on which the

A. Historical movement of major hosts

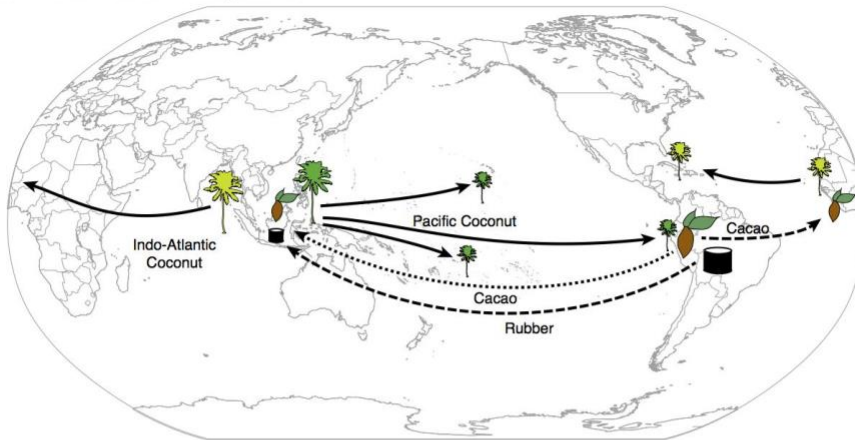

B. Inferred *P. palmivora* migration rates between regions and host groups

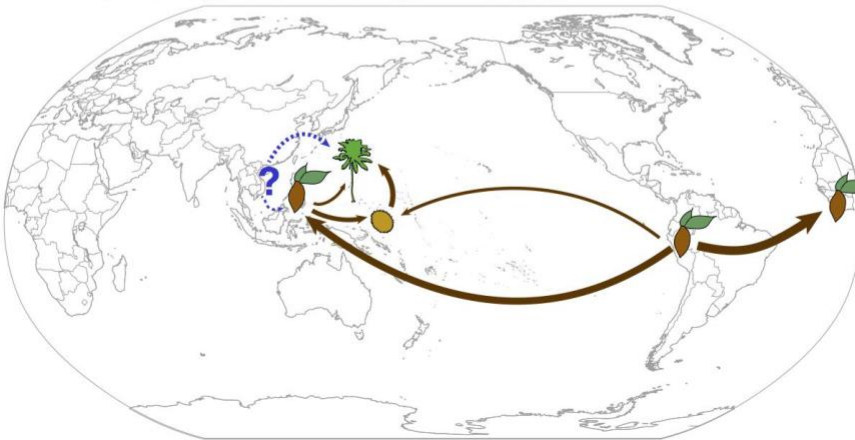

300

301 **Fig. 5. Movement of major hosts of *P. palmivora* out of their centers of origin and inferred**

302 **migration of *P. palmivora* by host group. (a)** Simplified historical movement of major *P.*

303 *palmivora* hosts. Indo-Atlantic and Pacific coconut were domesticated in South and Southeast

304 Asia, respectively. Cacao and rubber originated in South America. Many other tropical crops

305 host *P. palmivora*, including ornamentals. **(b)** Summary of BASTA inferences of *P. palmivora*

306 migration (solid lines, width proportional to mean migration rate) and potential migration from

307 an unsampled deme (dotted lines). BASTA inferred high migration rates from cacao in the

308 Americas to cacao in Asia-Pacific and Africa, and migration from cacao in Asia-Pacific to

309 coconut and other hosts (indicated by a durian fruit), as well as migration from cacao in the

310 Americas directly to other Asia-Pacific hosts.

311



312 pathogen could have dispersed or persisted over hundreds of years. If we assume that the  
313 divergence in sequences of isolates from Hawaii and other Pacific Islands are associated with  
314 human colonization of the Eastern Pacific islands around 1200 AD, we find that the colonization  
315 of global cacao production is during the last 150-200 years, as expected. The major documented  
316 movements of cacao to Africa and Asia was during the colonial period, and originated from  
317 Venezuela, Trinidad and Brazil<sup>52,57</sup>. Rubber is another major South American export and host of  
318 *P. palmivora*, with modern plantations located in South and Southeast Asia and West Africa<sup>59,60</sup>.  
319 The history of rubber in Asia started with the introduction of specimen trees from the Amazon  
320 region of Brazil to Ceylon, Singapore, and Penang in 1876, and rubber was established in  
321 plantations in Malaysia through 1898<sup>58</sup>.

322 We hypothesize that the diversity and genetic divergence of *P. palmivora* isolates in the  
323 Asia-Pacific region is an example of host-tracking. Our suggest that there may a long history of  
324 association of *P. palmivora* with coconut. Alternatively, *P. palmivora* may have long-term  
325 associations with other hosts native to Southeast Asia and coconut served primarily as an early  
326 vector for long-distance dispersal. The host-tracking model of plant pathogen emergence has  
327 been seen in other host-pathogen systems in Southeast Asia, such as the black Sigatoka pathogen  
328 *Mycosphaerella fijiensis* on banana<sup>61</sup> and blast fungus *Magnaporthe oryzae* on rice<sup>62</sup>. In contrast,  
329 the nearly monomorphic population *P. palmivora* found in Americas, South Asia, and Africa can  
330 be explained by a pandemic lineage of *P. palmivora* on cacao, following a genetic bottleneck  
331 likely associated with initial colonization of this host. The population of *P. palmivora* associated  
332 with cacao resembles the pattern of emergence of globally-distributed clonal lineages of *P.*  
333 *infestans* on potato<sup>21,63-65</sup>. Several other oomycetes have exhibited similar genetic bottlenecks

334 upon intercontinental spread, including *Phytophthora ramorum*<sup>28</sup>. These events are often  
335 associated with a host jump, particularly colonization of plants for export.

336 The evolutionary and geographic history of *P. palmivora* could be clarified by  
337 examination of additional isolates from uncultivated plants, which may represent older or more  
338 isolated populations, or by using preserved DNA from herbarium samples. In general, the  
339 distributions of crop pests and pathogens are highly dependent on the distribution of their hosts,  
340 even though the specific mechanisms of global spread differ among species<sup>66</sup>. The idiosyncrasies  
341 of plant movement during human history shaped the genetic variation and structure of modern  
342 populations of cultivated plants and of their pathogens. Therefore, efforts to manage disease may  
343 benefit from teasing apart historical dependencies that structure host and pathogen genetic  
344 variation and that are likely to mediate the plant-pathogen interaction.

345

## 346 **Methods**

347 ***P. palmivora* isolates.** Genomic DNA was provided from 95 isolates of *P. palmivora* in the  
348 World Oomycete Genetic Resource Collection at the University of California, Riverside, USA.  
349 The isolates were originally collected from 23 hosts and 22 countries on five continents (Africa,  
350 Asia, Australia, North America and South America) ([Supplementary Table 1](#)). For analysis,  
351 isolates were assigned to one of three large geographical regions: 1) Asia-Pacific (Asia, Australia  
352 and Pacific Islands); 2) Americas (including the Caribbean islands); and 3) Africa.

353 **Multilocus sequence typing.** Four housekeeping genes known to contain variation within  
354 *Phytophthora* species were used in this study: mitochondrial gene *coxII* with the adjacent  
355 spacer<sup>67</sup>, and three nuclear genes, *β-tubulin*, *pelota* and *trpI*<sup>68,69</sup>. Primers for the nuclear genes

356 were modified for *P. palmivora* based on draft whole genome sequence kindly provided by S.  
357 Schornack and S. Kamoun ([Supplementary Table 2](#)).

358 For PCR, a total reaction volume of 25.0  $\mu$ l was prepared including 1.0  $\mu$ l DNA template,  
359 1X OneTaq master mix (NEB), 0.2 $\mu$ M primers and 3.0  $\mu$ M MgCl<sub>2</sub>. PCR amplifications were  
360 performed using the following cycling protocol: initial denaturation at 94 °C for 3 minutes;  
361 followed by 35 cycles of 94 °C for 45 seconds, [(67 °C for 45 seconds (*pelota*); 58 °C for 45  
362 seconds ( *$\beta$ -tubulin*); 60 °C for 45 seconds (*coxII*); 59°C for 60 seconds (*trpI*)) and 68 °C for 1  
363 minute; then a final extension step was 68 °C for 10 minutes. PCR products were prepared for  
364 sequencing using ExoSAP-IT (USB Corporation, Cleveland, OH, USA) and directly sequenced  
365 in both directions at Interdisciplinary Center for Biotechnology Research (ICBR) at the  
366 University of Florida, USA. Reads were assembled and edited using software Geneious 6.1.8  
367 (<https://www.geneious.com>). For the three nuclear loci, haplotype phase was inferred using the  
368 program PHASE<sup>70</sup>, assuming diploidy. The settings for PHASE were as follows: MR0 (the  
369 default model, which is the general model for recombination rate variation<sup>71</sup>); number of  
370 iterations=10000 for  *$\beta$ -tubulin* and *trpI*, 2000 for *pelota*; thinning interval=1; burn-in=100. For  
371 each nuclear locus, ten isolates that exhibited more than one heterozygous site were randomly  
372 selected and cloned using the pGEM-T Easy Vector System (Promega Corporation, Madison,  
373 WI, USA). Sequences were aligned with Geneious 6.1.8<sup>72</sup>. Indels were removed for analysis.  
374 **Nucleotide diversity and neutrality tests.** Number of individuals (Nind), number of sequences  
375 (Nseq), number of haplotypes (Nhap), segregating sites (S), average pairwise nucleotide  
376 diversity ( $\pi$ )<sup>73,74</sup>, Watterson's theta ( $\theta_w$ )<sup>75</sup>, Tajima's D<sup>76-79</sup>, number of mutations, number of  
377 singleton mutations, Fu and Li's D\* and F\*<sup>76,77,80-85</sup> and minimum number of recombination  
378 events (Rm)<sup>86</sup> were determined for each of the four genes and by region using DnaSP v5<sup>87</sup>.

379 **Population subdivision and structure.** Population subdivision among the three major  
380 geographic regions (Africa, Americas and Asia-Pacific) and between two major hosts (coconut,  
381 native to Southeast Asia; and cacao, native to South America) were examined for each gene  
382 locus by analysis of molecular variance (AMOVA) in Arlequin 3.5.2.1<sup>88</sup>.

383 The population structure of *P. palmivora* was examined by model-based Bayesian  
384 clustering carried out in STRUCTURE 2.3.4<sup>36</sup>. For this analysis, allelic data were used from the  
385 three nuclear loci. The program STRUCTURE estimates parameters independently in the  
386 posterior probability distribution of allele frequencies. Parameters are estimated under the null  
387 model of panmixia within populations, which is characterized by Hardy-Weinberg equilibrium at  
388 each locus and an absence of linkage disequilibrium. The algorithm is robust to some departures  
389 from these assumptions<sup>89-91</sup>. Based on allele frequencies at each locus, STRUCTURE assigns Q-  
390 values (inferred ancestry) to each individual. Isolate P3444 was excluded, due to missing data for  
391 *pelota* and *trp1*. To reduce the effect of asexual reproduction on STRUCTURE inferences, two  
392 different input files were prepared. One used the full data set of 94 isolates and a second used a  
393 clone-corrected data set of 69 isolates. Clone correction is a method to remove bias caused by  
394 dominant or overrepresented genotypes generated by epidemic asexual reproduction. Here, we  
395 clone-corrected globally by including one representative isolate of each multilocus genotype. We  
396 applied the following workflow to analyze both input files. STRUCTURE was run using the  
397 admixture model, and cluster numbers (K) from K=1 to K=15 were evaluated using 500 000  
398 iterations after a burn-in period of 500 000 iterations. To evaluate the stability of the results  
399 across repeated runs, 20 independent runs were conducted. The runs for each value of K were  
400 evaluated based on the second order rate of change of the likelihood function with respect to K<sup>92</sup>  
401 using the online program *Structure Harvester* v.0.6.94<sup>93</sup>. Due to stochastic effects among

402 replicate STRUCTURE runs, assignment probabilities were compiled for multiple runs in the  
403 program CLUMPP version 1.2, which simplifies the assessment of replicate data by calculating  
404 medians<sup>94</sup>. The parameters used were M=3, W=0 and S=2, GREEDY\_OPTION=2, and  
405 REPEATS=10000. The graphical visualization of the output was produced using R base function  
406 ‘*barplot*’<sup>95</sup>.

407 Population subdivision, based on allelic data from the three nuclear genes, was also  
408 examined using model-free discriminant analysis of principal components (DAPC) implemented  
409 in the R package *adegenet* 1.4.2<sup>41</sup>. DAPC was run to confirm the results of Bayesian clustering  
410 approach. DAPC does not make biological assumptions and is less computationally intensive  
411 than STRUCTURE. This method maximizes the variation between groups while minimizing  
412 variation within group. First, DAPC transforms the data using principal components analysis  
413 (PCA) and then discriminant analysis (DA) assigns individuals to clusters. The data  
414 transformation ensures that the variables inputted to DA are uncorrelated and that their number is  
415 less than that of analyzed individuals, so as to overcome the drawbacks of direct application of  
416 DA. The appropriate number of principal components retained in the analysis can be determined  
417 by cross-validation<sup>41</sup>. Because only one isolate, P8039, was in the pre-defined coconut-Africa  
418 group and could not be used for in both training and validation sets, we removed this isolate and  
419 retained 93 isolates for the DAPC analyses.

420 **Genealogies and Phylogeographic Analysis.** To infer the phylogeographic history of *P.*  
421 *palmivora*, genealogies were inferred by Bayesian evolutionary analysis by sampling trees  
422 (BEAST) and location states by discrete trait analysis<sup>37,46</sup>. We conducted separate analyses for  
423 each locus, each of which is expected to have a different genealogy from the others. BEAST  
424 executes ancestral reconstruction of discrete states, here location of collection, in a Bayesian

425 statistical framework for evolutionary hypothesis testing using rooted, time-measured  
426 phylogenies. In this analysis, locations associated with branch nodes were characterized by  
427 continuous time Markov chain models, comparable to nucleotide, codon or amino acid  
428 substitution models and Bayesian stochastic search variable selection (BSSVS) was used to  
429 model the phylogeographic dispersion process<sup>45</sup>. This approach uses the geographic locations of  
430 the samples to reconstruct the ancestral states of tree nodes and the root state. A strict molecular  
431 clock model was used. The mutation rate was set as a constant 1.0, consequently the estimation  
432 of branch lengths is in substitutions per site. We used jModelTest 2.1<sup>96</sup> to obtain the best fitting  
433 models of nucleotide substitution for each gene alignment. A coalescent tree prior and a prior of  
434 constant population size were assumed. Three replications of independent MCMC were run for  
435 each locus and the first 10% of recorded states were discarded as burn-in (parameter settings in  
436 [Supplementary Table 3](#)). The program was run until effective sample size estimates of greater  
437 than 200 were obtained, with good mixing and convergence in independent runs, as assessed in  
438 Tracer v1.6<sup>97</sup>. Maximum clade credibility (MCC) trees were summarized by TreeAnnotator  
439 based on common ancestor height<sup>98</sup> and visualized using R package *rBi*<sup>99</sup>.

440 We complemented the above analysis with Bayesian structured coalescent approximation  
441 (BASTA)<sup>44</sup> in BEAST 2.0<sup>100</sup>. BASTA incorporates migration into the structured coalescent-  
442 based model rather than modeling migration independently from the coalescent process as in the  
443 above discrete phylogeographic analysis. BASTA phylogeographic inferences are less influenced  
444 by sampling bias and variation in sampling intensity, and can include unsampled ghost demes.  
445 All four loci were used in the analysis, were assumed to be unlinked, and were assigned different  
446 nucleotide substitution models, as determined using jModeltest2 for each locus. The symmetric  
447 BSSVS with 24 locations (shown in Fig. 4) was used to model the phylogeographic dispersion

448 process, which assumed a prior in which 60 migration rates are expected to be non-zero<sup>45</sup>. We  
449 assumed the same population size for all demes. Two billion steps were used in the MCMC  
450 chain for each run, and one tree was recorded every 200 000 steps. To reduce the lengthy  
451 running time and to obtain an effective sample size estimates of greater than 200 with good  
452 mixing and convergence, two parallel runs with different seed numbers were implemented, and  
453 the two parallel tree files for each locus were merged. The merged tree files were assessed in  
454 Tracer v1.6<sup>97</sup>. After the first 10% of recorded ‘burn-in’ states were discarded, MCC trees were  
455 summarized by TreeAnnotator based on common ancestor height<sup>98</sup>.

456 We also used BASTA to explore major between-host transmissions in relation to  
457 geography by estimating migration rates between demes defined by host and region. We started  
458 with a simple model of the two major hosts, cacao and coconut, to determine which of these two  
459 is more likely to be the ancestral host of *P. palmivora*. We incorporated geography by splitting  
460 cacao isolates into cacao-Asia-Pacific and cacao-America demes, resulting in three demes:  
461 cacao-America, cacao-Asia-Pacific and coconut-Asia. We also examined the effect of adding an  
462 unsampled (ghost) deme. Because we did not include isolates collected from hosts other than  
463 coconuts and cacao in the Asia-Pacific region, we grouped these isolates into a deme to  
464 determine if these hosts represented the unsampled (ghost) deme. Finally, we examined the  
465 effect on the above models of adding a cacao-Africa deme, although the sample size from Africa  
466 is small. The four loci were assumed to be unlinked and assigned different nucleotide  
467 substitution models, as above. We ran migration models that allowed for asymmetric migration  
468 between demes, assuming the same population size for all demes. Three hundred million steps  
469 were used in the MCMC chain for each run, and one tree was recorded every 100 000 steps.

470 Mixing was assessed and trees examined as above. The MCC trees were visualized by  
471 IcyTree<sup>101</sup>. Two replications of independent MCMC were run for each model.

472

### 473 **Data availability**

474 The DNA sequence data, inferred haplotypes and the analysis scripts that support the findings of  
475 this study will be made available from the Dryad repository upon submission of this preprint to  
476 another journal.

477

### 478 **References:**

- 479 1. Zhan, J., Thrall, P. H., Papaïx, J., Xie, L. & Burdon, J. J. Playing on a pathogen's weakness:  
480 Using evolution to guide sustainable plant disease control strategies. *Annu. Rev.*  
481 *Phytopathol.* **53**, 19–43 (2015).
- 482 2. Savary, S., Ficke, A., Aubertot, J.-N. & Hollier, C. Crop losses due to diseases and their  
483 implications for global food production losses and food security. *Food Sec.* **4**, 519–537  
484 (2012).
- 485 3. Estoup, A. & Guillemaud, T. Reconstructing routes of invasion using genetic data: why,  
486 how and so what? *Molecular Ecology* **19**, 4113–4130 (2010).
- 487 4. Lawson Handley, L.-J. *et al.* Ecological genetics of invasive alien species. *BioControl* **56**,  
488 409–428 (2011).
- 489 5. Taole, M., Bihon, W., Wingfield, B. D., Wingfield, M. J. & Burgess, T. I. Multiple  
490 introductions from multiple sources: invasion patterns for an important Eucalyptus leaf  
491 pathogen. *Ecol Evol* **5**, 4210–4220 (2015).
- 492 6. Hänfling, B., Carvalho, G. R. & Brandl, R. mt-DNA sequences and possible invasion  
493 pathways of the Chinese mitten crab. *Marine Ecology Progress Series* **238**, 307–310  
494 (2002).
- 495 7. Downie, D. A. Locating the sources of an invasive pest, grape phylloxera, using a  
496 mitochondrial DNA gene genealogy. *Mol. Ecol.* **11**, 2013–2026 (2002).
- 497 8. Floerl, O., Inglis, G. J., Dey, K. & Smith, A. The importance of transport hubs in stepping-  
498 stone invasions. *Journal of Applied Ecology* **46**, 37–45 (2009).
- 499 9. Singh, R. P. *et al.* The emergence of Ug99 races of the stem rust fungus is a threat to world  
500 wheat production. *Annual Review of Phytopathology* **49**, 465–481 (2011).
- 501 10. Cooke, D. E. L. *et al.* Genome analyses of an aggressive and invasive lineage of the Irish  
502 potato famine pathogen. *PLOS Pathogens* **8**, e1002940 (2012).
- 503 11. Stukenbrock, E. H. Evolution, selection and isolation: a genomic view of speciation in



- 504 fungal plant pathogens. *New Phytologist* **199**, 895–907 (2013).
- 505 12. Restrepo, S., Tabima, J. F., Mideros, M. F., Grünwald, N. J. & Matute, D. R. Speciation in  
506 fungal and oomycete plant pathogens. *Annu Rev Phytopathol* **52**, 289–316 (2014).
- 507 13. Sax, D. F. & Brown, J. H. The paradox of invasion. *Global Ecology and Biogeography* **9**,  
508 363–371 (2000).
- 509 14. Tilman, D. *et al.* Forecasting agriculturally driven global environmental change. *Science*  
510 **292**, 281–284 (2001).
- 511 15. Lockwood, J. L., Cassey, P. & Blackburn, T. The role of propagule pressure in explaining  
512 species invasions. *Trends Ecol. Evol.* **20**, 223–228 (2005).
- 513 16. Couch, B. C. *et al.* Origins of host-specific populations of the blast pathogen *Magnaporthe*  
514 *oryzae* in crop domestication with subsequent expansion of pandemic clones on rice and  
515 weeds of rice. *Genetics* **170**, 613–630 (2005).
- 516 17. Stukenbrock, E. H., Banke, S., Javan-Nikkhah, M. & McDonald, B. A. Origin and  
517 domestication of the fungal wheat pathogen *Mycosphaerella graminicola* via sympatric  
518 speciation. *Mol. Biol. Evol.* **24**, 398–411 (2007).
- 519 18. Gladieux, P. *et al.* On the Origin and Spread of the Scab Disease of Apple: Out of Central  
520 Asia. *PLOS ONE* **3**, e1455 (2008).
- 521 19. Munkacsí, A. B., Stoxen, S. & May, G. *Ustilago maydis* populations tracked maize through  
522 domestication and cultivation in the Americas. *Proc. Biol. Sci.* **275**, 1037–1046 (2008).
- 523 20. Ali, S. *et al.* Origin, Migration routes and worldwide population genetic structure of the  
524 wheat yellow rust pathogen *Puccinia striiformis* f.sp. *tritici*. *PLOS Pathogens* **10**, e1003903  
525 (2014).
- 526 21. Goss, E. M. *et al.* The Irish potato famine pathogen *Phytophthora infestans* originated in  
527 central Mexico rather than the Andes. *PNAS* **111**, 8791–8796 (2014).
- 528 22. Nelson, S. C. & Abad, Z. G. *Phytophthora morindae*, a new species causing black flag  
529 disease on noni (*Morinda citrifolia* L) in Hawaii. *Mycologia* **102**, 122–134 (2010).
- 530 23. Érsek, T. & Ribeiro, O. Mini Review Article: An annotated list of new *Phytophthora*  
531 species described post 1996. *Acta Phytopathologica et Entomologica Hungarica* **45**, 251–  
532 266 (2010).
- 533 24. Hansen, E. M., Reeser, P. W. & Sutton, W. *Phytophthora* beyond agriculture. *Annual*  
534 *Review of Phytopathology* **50**, 359–378 (2012).
- 535 25. Kroon, L. P. N. M., Brouwer, H., de Cock, A. W. A. M. & Govers, F. The genus  
536 *Phytophthora* anno 2012. *Phytopathology* **102**, 348–364 (2012).
- 537 26. Erwin, D. C. & Ribeiro, O. K. *Phytophthora* diseases worldwide. American  
538 Phytopathological Society (APS Press), St. Paul, MN, USA (1996).
- 539 27. Fry, W. E. *et al.* Five reasons to consider *Phytophthora infestans* a reemerging pathogen.  
540 *Phytopathology* **105**, 966–981 (2015).
- 541 28. Grünwald, N. J., Garbelotto, M., Goss, E. M., Heungens, K. & Prospero, S. Emergence of  
542 the sudden oak death pathogen *Phytophthora ramorum*. *Trends Microbiol.* **20**, 131–138

- 543 (2012).
- 544 29. John T. Kliejunas. Sudden oak death and *Phytophthora ramorum*: a summary of the  
545 literature. Gen. Tech. Rep. PSW-GTR-234. U.S. Department of Agriculture, Forest Service,  
546 Pacific Southwest Research Station, Albany, CA (2010).
- 547 30. Mchau, G. R. A. & Coffey, M. D. Isozyme diversity in *Phytophthora palmivora*: Evidence  
548 for a southeast Asian centre of origin. *Mycological Research* **98**, 1035–1043 (1994).
- 549 31. Lamour, K. *Phytophthora: A Global Perspective*. (CABI, 2013).
- 550 32. Torres, G. A. *et al.* Bud Rot Caused by *Phytophthora palmivora*: A Destructive emerging  
551 disease of oil palm. *Phytopathology* **106**, 320–329 (2016).
- 552 33. Ali, S. S. *et al.* *Phytophthora megakarya* and *P. palmivora*, closely related causal agents of  
553 cacao black pod rot, underwent increases in genome sizes and gene numbers by different  
554 mechanisms. *Genome Biol Evol* (2017). doi:10.1093/gbe/evx021
- 555 34. Zentmyer, G. A. Origin and distribution of four species of *Phytophthora*. *Transactions of*  
556 *the British Mycological Society* **91**, 367–378 (1988).
- 557 35. Oudemans, P. & Coffey, M. D. A revised systematics of twelve papillate *Phytophthora*  
558 species based on isozyme analysis. *Mycological Research* **95**, 1025–1046 (1991).
- 559 36. Pritchard, J. K., Stephens, M. & Donnelly, P. Inference of population structure using  
560 multilocus genotype data. *Genetics* **155**, 945–959 (2000).
- 561 37. Drummond, A. J. & Rambaut, A. BEAST: Bayesian evolutionary analysis by sampling  
562 trees. *BMC Evol. Biol.* **7**, 214 (2007).
- 563 38. Cornuet, J.-M. *et al.* Inferring population history with DIY ABC: a user-friendly approach  
564 to approximate Bayesian computation. *Bioinformatics* **24**, 2713–2719 (2008).
- 565 39. Beaumont, M. A. Approximate Bayesian computation in evolution and ecology. *Annual*  
566 *Review of Ecology, Evolution, and Systematics* **41**, 379–406 (2010).
- 567 40. Beerli, P. & Palczewski, M. Unified framework to evaluate panmixia and migration  
568 direction among multiple sampling locations. *Genetics* **185**, 313–326 (2010).
- 569 41. Jombart, T., Devillard, S. & Balloux, F. Discriminant analysis of principal components: A  
570 new method for the analysis of genetically structured populations. *BMC Genetics* **11**, 94  
571 (2010).
- 572 42. Kamvar, Z. N., Tabima, J. F. & Grünwald, N. J. Poppr: An R package for genetic analysis  
573 of populations with clonal, partially clonal, and/or sexual reproduction. *PeerJ* **2**, e281  
574 (2014).
- 575 43. Kamvar, Z. N., Brooks, J. C. & Grünwald, N. J. Novel R tools for analysis of genome-wide  
576 population genetic data with emphasis on clonality. *Front Genet* **6**, (2015).
- 577 44. De Maio, N., Wu, C.-H., O’Reilly, K. M. & Wilson, D. New Routes to Phylogeography: A  
578 Bayesian structured coalescent approximation. *PLOS Genetics* **11**, e1005421 (2015).
- 579 45. Lemey, P., Rambaut, A., Drummond, A. J. & Suchard, M. A. Bayesian phylogeography  
580 finds its roots. *PLOS Computational Biology* **5**, e1000520 (2009).
- 581 46. Drummond, A. J., Suchard, M. A., Xie, D. & Rambaut, A. Bayesian phylogenetics with

- 582 BEAUti and the BEAST 1.7. *Mol. Biol. Evol.* **29**, 1969–1973 (2012).
- 583 47. Gunn, B. F., Baudouin, L. & Olsen, K. M. Independent origins of cultivated coconut  
584 (*Cocos nucifera* L.) in the Old World tropics. *PLOS ONE* **6**, e21143 (2011).
- 585 48. Fay, J. C. & Wu, C. I. A human population bottleneck can account for the discordance  
586 between patterns of mitochondrial versus nuclear DNA variation. *Mol. Biol. Evol.* **16**,  
587 1003–1005 (1999).
- 588 49. Adler, N. E. *et al.* Genetic Diversity of *Phytophthora infestans* sensu lato in Ecuador  
589 provides new insight into the origin of this important plant pathogen. *Phytopathology* **94**,  
590 154–162 (2004).
- 591 50. Goss, E. M. Genome-enabled analysis of plant-pathogen migration. *Annual Review of*  
592 *Phytopathology* **53**, 121–135 (2015).
- 593 51. Buggs, R. J. A., Soltis, P. S. & Soltis, D. E. Does hybridization between divergent  
594 progenitors drive whole-genome duplication? *Mol. Ecol.* **18**, 3334–3339 (2009).
- 595 52. Motamayor, J. C. *et al.* Cacao domestication I: the origin of the cacao cultivated by the  
596 Mayas. *Heredity* **89**, 380–386 (2002).
- 597 53. Verheye, W. Growth and production of rubber. *Land Use, Land Cover and Soil Sciences.*  
598 *Encyclopedia of life support systems (EOLSS)*, UNESCO-EOLSS Publishers, Oxford, UK  
599 (2010).
- 600 54. Hine, R. B. Pathogenicity of *Phytophthora palmivora* in the Orchidaceae. *Plant Dis. Rep.*  
601 **46**, 643–645 (1962).
- 602 55. Baudouin, L. & Lebrun, P. Coconut (*Cocos nucifera* L.) DNA studies support the  
603 hypothesis of an ancient Austronesian migration from Southeast Asia to America. *Genet*  
604 *Resour Crop Evol* **56**, 257–262 (2009).
- 605 56. Roullier, C., Benoit, L., McKey, D. B. & Lebot, V. Historical collections reveal patterns of  
606 diffusion of sweet potato in Oceania obscured by modern plant movements and  
607 recombination. *PNAS* **110**, 2205–2210 (2013).
- 608 57. Wood, G. R. A history of early cocoa introductions. *Cocoa Growers' Bull.* **44**, 7-12 (1991).
- 609 58. Gin, O. K. *Southeast Asia : A Historical Encyclopedia, From Angkor Wat to East Timor.*  
610 ABC-CLIO, Inc., Santa Barbara, CA, USA (2004).
- 611 59. Hallucinogenic Plants: Richard Evans Schultes, Elmer W. Smith: 9780307243621:  
612 Amazon.com: Books. Available at: [https://www.amazon.com/Hallucinogenic-Plants-](https://www.amazon.com/Hallucinogenic-Plants-Richard-Evans-Schultes/dp/0307243621)  
613 [Richard-Evans-Schultes/dp/0307243621](https://www.amazon.com/Hallucinogenic-Plants-Richard-Evans-Schultes/dp/0307243621). (Accessed: 16th March 2019)
- 614 60. Frank Z. *The International Natural Rubber Market 1870-1930*. Economic History  
615 Association (2010).
- 616 61. Robert, S., Ravigne, V., Zapater, M.-F., Abadie, C. & Carlier, J. Contrasting introduction  
617 scenarios among continents in the worldwide invasion of the banana fungal pathogen  
618 *Mycosphaerella fijiensis*. *Mol. Ecol.* **21**, 1098–1114 (2012).
- 619 62. Saleh, D., Milazzo, J., Adreit, H., Fournier, E. & Tharreau, D. South-East Asia is the center  
620 of origin, diversity and dispersion of the rice blast fungus, *Magnaporthe oryzae*. *New*  
621 *Phytol.* **201**, 1440–1456 (2014).

- 622 63. Grünwald, N. J. & Flier, W. G. The biology of *Phytophthora infestans* at its center of  
623 origin. *Annu Rev Phytopathol* **43**, 171–190 (2005).
- 624 64. Gómez-Alpizar, L., Carbone, I. & Ristaino, J. B. An Andean origin of *Phytophthora*  
625 *infestans* inferred from mitochondrial and nuclear gene genealogies. *PNAS* **104**, 3306–3311  
626 (2007).
- 627 65. Wang, J. *et al.* High levels of diversity and population structure in the potato late blight  
628 pathogen at the Mexico centre of origin. *Mol. Ecol.* **26**, 1091–1107 (2017).
- 629 66. Bebber, D. P., Holmes, T. & Gurr, S. J. The global spread of crop pests and pathogens.  
630 *Global Ecology and Biogeography* **23**, 1398–1407 (2014).
- 631 67. Martin, F. N. Mitochondrial haplotype determination in the oomycete plant pathogen  
632 *Phytophthora ramorum*. *Curr Genet* **54**, 23–34 (2008).
- 633 68. Blair, J. E., Coffey, M. D., Park, S.-Y., Geiser, D. M. & Kang, S. A multi-locus phylogeny  
634 for *Phytophthora* utilizing markers derived from complete genome sequences. *Fungal*  
635 *Genet. Biol.* **45**, 266–277 (2008).
- 636 69. Goss, E. M., Carbone, I. & Grünwald, N. J. Ancient isolation and independent evolution of  
637 the three clonal lineages of the exotic sudden oak death pathogen *Phytophthora ramorum*.  
638 *Mol. Ecol.* **18**, 1161–1174 (2009).
- 639 70. Stephens, M., Smith, N. J. & Donnelly, P. A new statistical method for haplotype  
640 reconstruction from population data. *Am. J. Hum. Genet.* **68**, 978–989 (2001).
- 641 71. Li, N. & Stephens, M. Modeling linkage disequilibrium and identifying recombination  
642 hotspots using single-nucleotide polymorphism data. *Genetics* **165**, 2213–2233 (2003).
- 643 72. Kearse, M. *et al.* Geneious Basic: An integrated and extendable desktop software platform  
644 for the organization and analysis of sequence data. *Bioinformatics* **28**, 1647–1649 (2012).
- 645 73. Nei, M. *Molecular Evolutionary Genetics*. Columbia University Press, New York, NY,  
646 USA (1987).
- 647 74. Nei, M. & Miller, J. C. A simple method for estimating average number of nucleotide  
648 substitutions within and between populations from restriction data. *Genetics* **125**, 873–879  
649 (1990).
- 650 75. Watterson, G. A. On the number of segregating sites in genetical models without  
651 recombination. *Theor Popul Biol* **7**, 256–276 (1975).
- 652 76. Kimura, M. *The Neutral Theory of Molecular Evolution*. Cambridge University Press,  
653 Cambridge, UK (1983). doi:10.1017/CBO9780511623486
- 654 77. Tajima, F. Evolutionary relationship of DNA sequences in finite populations. *Genetics* **105**,  
655 437–460 (1983).
- 656 78. Tajima, F. Statistical method for testing the neutral mutation hypothesis by DNA  
657 polymorphism. *Genetics* **123**, 585–595 (1989).
- 658 79. Tajima, F. Measurement of DNA polymorphism. Takahata N, Clark AG (eds), *Mechanisms*  
659 *of Molecular Evolution.*, Sinauer Associates Inc, Sunderland, MA, USA, 37–59 (1993).
- 660 80. Ewens, W. J. The sampling theory of selectively neutral alleles. *Theoretical Population*

- 661 *Biology* **3**, 87–112 (1972).
- 662 81. Strobeck, C. Average number of nucleotide differences in a sample from a single  
663 subpopulation: a test for population subdivision. *Genetics* **117**, 149–153 (1987).
- 664 82. Fu, Y. X. & Li, W. H. Statistical tests of neutrality of mutations. *Genetics* **133**, 693–709  
665 (1993).
- 666 83. Simonsen, K. L., Churchill, G. A. & Aquadro, C. F. Properties of statistical tests of  
667 neutrality for DNA polymorphism data. *Genetics* **141**, 413–429 (1995).
- 668 84. Fu, Y. X. Statistical properties of segregating sites. *Theor Popul Biol* **48**, 172–197 (1995).
- 669 85. Fu, Y. X. Statistical tests of neutrality of mutations against population growth, hitchhiking  
670 and background selection. *Genetics* **147**, 915–925 (1997).
- 671 86. Hudson, R. R. & Kaplan, N. L. Statistical properties of the number of recombination events  
672 in the history of a sample of DNA sequences. *Genetics* **111**, 147–164 (1985).
- 673 87. Librado, P. & Rozas, J. DnaSP v5: A software for comprehensive analysis of DNA  
674 polymorphism data. *Bioinformatics* **25**, 1451–1452 (2009).
- 675 88. Excoffier, L. & Lischer, H. E. L. Arlequin suite ver 3.5: A new series of programs to  
676 perform population genetics analyses under Linux and Windows. *Mol Ecol Resour* **10**, 564–  
677 567 (2010).
- 678 89. Falush, D., Stephens, M. & Pritchard, J. K. Inference of population structure using  
679 multilocus genotype data: Linked loci and correlated allele frequencies. *Genetics* **164**,  
680 1567–1587 (2003).
- 681 90. Halkett, F., Simon, J.-C. & Balloux, F. Tackling the population genetics of clonal and  
682 partially clonal organisms. *Trends Ecol. Evol. (Amst.)* **20**, 194–201 (2005).
- 683 91. Kaeuffer, R., Réale, D., Coltman, D. W. & Pontier, D. Detecting population structure using  
684 STRUCTURE software: effect of background linkage disequilibrium. *Heredity (Edinb)* **99**,  
685 374–380 (2007).
- 686 92. Evanno, G., Regnaut, S. & Goudet, J. Detecting the number of clusters of individuals using  
687 the software STRUCTURE: a simulation study. *Mol. Ecol.* **14**, 2611–2620 (2005).
- 688 93. Earl, D. A. & vonHoldt, B. M. STRUCTURE HARVESTER: a website and program for  
689 visualizing STRUCTURE output and implementing the Evanno method. *Conservation*  
690 *Genet Resour* **4**, 359–361 (2012).
- 691 94. Jakobsson, M. & Rosenberg, N. A. CLUMPP: a cluster matching and permutation program  
692 for dealing with label switching and multimodality in analysis of population structure.  
693 *Bioinformatics* **23**, 1801–1806 (2007).
- 694 95. Team RC. R: A language and environment for statistical computing. (2013).
- 695 96. Darriba, D., Taboada, G. L., Doallo, R. & Posada, D. jModelTest 2: more models, new  
696 heuristics and parallel computing. *Nat. Methods* **9**, 772 (2012).
- 697 97. Rambaut, A., Suchard, M., Xie, D. & Drummond, A. *Tracer v1.6*. Available from  
698 <http://beast.bio.ed.ac.uk/Tracer> (2014).
- 699 98. Heled, J. & Bouckaert, R. R. Looking for trees in the forest: Summary tree from posterior

- 700 samples. *BMC Evolutionary Biology* **13**, 221 (2013).
- 701 99. Sánchez-Ramírez, S. *rBt: Handy functions for dealing with BEAST trees in R*. GitHub  
702 repository: <https://github.com/santiagosnchez/rBt> (2018).
- 703 100. Bouckaert, R. *et al.* BEAST 2: A software platform for Bayesian evolutionary analysis.  
704 *PLOS Computational Biology* **10**, e1003537 (2014).
- 705 101. Vaughan, T. G. IcyTree: rapid browser-based visualization for phylogenetic trees and  
706 networks. *Bioinformatics* **33**, 2392–2394 (2017).
- 707 102. Marin-Burgos, V., Clancy, J. S. Understanding the expansion of energy crops beyond the  
708 global biofuel boom: evidence from oil palm expansion in Colombia. *Energ. Sustain.*  
709 *Soc.* **7**, 21 (2017). <https://doi.org/10.1186/s13705-017-0123-2>
- 710 103. Drenth, A. & Sendall, B. Economic impact of *Phytophthora* diseases in Southeast Asia.  
711 Drenth, A. & Guest, D.I., eds. Diversity and management of *Phytophthora* in Southeast  
712 Asia. Australian Centre for International Agricultural Research (ACIAR), Canberra,  
713 Australia, ACIAR Monograph No. 114, 10–28 (2004).

714

#### 715 **Acknowledgements**

716 We thank Jordan McLendon for assistance in the laboratory, Sebastian Schornack and Sophien  
717 Kamoun for sharing *P. palmivora* genome data for primer design, and Santiago Sánchez-  
718 Ramírez for assistance with *rBt*. This work was supported by the University of Florida  
719 Department of Plant Pathology and Emerging Pathogens Institute.

720

#### 721 **Author contributions**

722 JW and EMG designed the experiments. MDC contributed the DNA samples of *Phytophthora*  
723 *palmivora* from the World Oomycete Genetic Resource Collection. JW performed the data  
724 analyses with contributions from EMG and NDM. JW and EMG wrote the manuscript with  
725 contribution from NDM and MDC. All authors reviewed and approved the manuscript.

726

#### 727 **Competing interests**

728 The authors declare no competing financial interests.

## TABLES

**Table 1.** Nucleotide variation by locus and geographic region. Statistics given are number of individuals (Nind), number of sequences (Nseq), number of haplotypes (Nhap), segregating sites (S), average pairwise nucleotide diversity ( $\pi$ ), Watterson's theta ( $\theta_w$ ), Tajima's D, number of mutations, number of singleton mutations, Fu and Li's D\* and F\*, and minimum number of recombination events (Rm).

| Locus                             | Geographic region | Nind | Nseq | Nhap | S  | $\Pi$  | $\theta_w$ | Tajima's D   | Number of mutations | Number of singleton mutations | Fu & Li's D* | Fu & Li's F* | Rm |
|-----------------------------------|-------------------|------|------|------|----|--------|------------|--------------|---------------------|-------------------------------|--------------|--------------|----|
| <i><math>\beta</math>-tubulin</i> | Africa            | 6    | 12   | 4    | 23 | 0.0076 | 7.6        | 1.53         | 23                  | 6                             | 0.44         | 0.82         | 1  |
|                                   | America           | 18   | 36   | 7    | 30 | 0.0072 | 7.2        | 1.20         | 30                  | 10                            | -0.61        | <-0.01       | 6  |
|                                   | Asia-Pacific      | 66   | 132  | 45   | 55 | 0.0088 | 10.1       | 0.56         | 55                  | 11                            | -0.19        | 0.15         | 14 |
| <i>pelota</i>                     | Africa            | 6    | 12   | 6    | 14 | 0.0097 | 4.6        | 0.96         | 15                  | 5                             | 0.12         | 0.38         | 0  |
|                                   | America           | 18   | 36   | 8    | 20 | 0.0091 | 4.8        | 0.63         | 20                  | 8                             | -1.01        | -0.56        | 3  |
|                                   | Asia-Pacific      | 68   | 136  | 38   | 36 | 0.0108 | 6.6        | -0.06        | 38                  | 13                            | -1.82        | -1.31        | 8  |
| <i>trp1</i>                       | Africa            | 5    | 10   | 5    | 9  | 0.0053 | 3.2        | 1.42         | 10                  | 2                             | 0.71         | 1.00         | 0  |
|                                   | America           | 16   | 32   | 6    | 10 | 0.0048 | 2.5        | <b>2.19</b>  | 10                  | 2                             | 0.31         | 1.05         | 2  |
|                                   | Asia-Pacific      | 69   | 138  | 24   | 35 | 0.0045 | 6.4        | -1.24        | 37                  | 10                            | -1.00        | -1.32        | 6  |
| <i>coxII</i> and spacer           | Africa            | 5    | 5    | 2    | 10 | 0.0068 | 4.8        | -1.19        | 10                  | 10                            | -1.19        | -1.26        | 0  |
|                                   | America           | 17   | 17   | 4    | 7  | 0.0018 | 2.1        | <b>-2.00</b> | 8                   | 7                             | <b>-2.41</b> | <b>-2.65</b> | 0  |
|                                   | Asia-Pacific      | 62   | 62   | 28   | 24 | 0.0083 | 5.1        | -0.25        | 25                  | 3                             | 0.80         | 0.50         | 7  |

Bold:  $P < 0.05$ .

**Table 2.** Analysis of molecular variance among three major geographic regions and two major hosts.

| Loci                    | Source of variation | Percentage of variation | F <sub>ST</sub> * |
|-------------------------|---------------------|-------------------------|-------------------|
| <i>β-tubulin</i>        | Among regions       | 7.77                    | 0.08              |
| <i>pelota</i>           |                     | 10.01                   | 0.10              |
| <i>trp1</i>             |                     | 11.54                   | 0.12              |
| <i>coxII</i> and spacer |                     | 8.16                    | 0.08              |
| <i>β-tubulin</i>        | Among hosts         | 22.64                   | 0.23              |
| <i>pelota</i>           |                     | 27.38                   | 0.27              |
| <i>trp1</i>             |                     | 23.97                   | 0.24              |
| <i>coxII</i> and spacer |                     | 11.90                   | 0.12              |

\*All values of F<sub>ST</sub> were statistically significant with  $P < 0.05$ .



**Table 3.** Estimates of migration rates between demes defined by hosts and geographical regions.

**a. Three-deme model\***

| Source deme       | Root state probability | Mean estimated immigration rate [95% HPD]: |                                      |                                      |
|-------------------|------------------------|--------------------------------------------|--------------------------------------|--------------------------------------|
|                   |                        | Cacao-America                              | Cacao-AsiaPacific                    | Coconut-Asia                         |
| Cacao-America     | 0.93-0.94              | -                                          | <b>0.447</b><br><b>[0.158-0.785]</b> | 0.108<br>[0-0.271]                   |
| Cacao-AsiaPacific | <0.1                   | 0.069<br>[0-0.188]                         | -                                    | <b>0.306</b><br><b>[0.076-0.575]</b> |
| Coconut-Asia      | <0.1                   | 0.031<br>[0-0.091]                         | 0.043<br>[0-0.130]                   | -                                    |

\* *P.palmivora* isolates from coconuts in America were not present in our sample

Bold: lower boundary of 95% HPD > 0.001

**b. Four-deme model, including an unsampled deme**

| Source deme       | Root state probability | Mean estimated immigration rate [95% HPD]: |                                      |                                      |                    |
|-------------------|------------------------|--------------------------------------------|--------------------------------------|--------------------------------------|--------------------|
|                   |                        | Cacao-America                              | Cacao-AsiaPacific                    | Coconut-Asia                         | Unsampled          |
| Cacao-America     | 0.63-0.68              | -                                          | <b>0.476</b><br><b>[0.171-0.827]</b> | 0.11<br>[0-0.273]                    | 0.069<br>[0-0.212] |
| Cacao-AsiaPacific | <0.1                   | 0.063<br>[0-0.180]                         | -                                    | <b>0.314</b><br><b>[0.053-0.604]</b> | 0.082<br>[0-0.248] |
| Coconut-Asia      | <0.1                   | 0.031<br>[0-0.092]                         | 0.048<br>[0-0.146]                   | -                                    | 0.085<br>[0-0.252] |
| Unsampled         | 0.27-0.31              | 0.076<br>[0-0.192]                         | 0.113<br>[0-0.321]                   | 0.272<br>[0-0.606]                   | -                  |

Bold: lower boundary of 95% HPD > 0.001

c. Four-deme model, including a putative Others-AsiaPacific deme

---

Mean estimated immigration rate [95% HPD]:

| Source deme        | Root state probability | Cacao-America      | Cacao-AsiaPacific             | Coconut-Asia                  | Others-AsiaPacific            |
|--------------------|------------------------|--------------------|-------------------------------|-------------------------------|-------------------------------|
| Cacao-America      | 0.95-0.97              | -                  | <b>0.403</b><br>[0.149-0.698] | 0.104<br>[0-0.228]            | <b>0.222</b><br>[0.034-0.433] |
| Cacao-AsiaPacific  | <0.1                   | 0.037<br>[0-0.110] | -                             | <b>0.195</b><br>[0.004-0.395] | <b>0.316</b><br>[0.004-0.599] |
| Coconut-Asia       | <0.1                   | 0.018<br>[0-0.054] | 0.047<br>[0-0.139]            | -                             | <b>0.359</b><br>[0.148-0.599] |
| Others-AsiaPacific | <0.1                   | 0.028<br>[0-0.081] | 0.050<br>[0-0.153]            | 0.052<br>[0-0.152]            | -                             |

---

Bold: lower boundary of 95% HPD > 0.001
